# Supplementary material for: Influence of Endosperm Starch Composition on Maize Response to Fusarium temperatum Scaufl. & Munaut
Source: MDPI journal article supplement (doi:10.3390/toxins14030200), 2022-03-08
Supplement: s1 [file s1]

# Supplementary Materials: Influence of Endosperm Starch Composition on Maize Response to *Fusarium temperatum* Scaufl. & Munaut

Marcin Wit, Piotr Ochodзки, Roman Warzecha, Emilia Jabłońska, Ewa Mirzwa-Mróż, Elżbieta Mielniczuk, and Wojciech Wakuliński

**Table S1.** ANOVA analysis of the influence of the maize type, cropping season, and field localization on disease severity index  $I_{FER}$  after plant inoculation with *F. temperatum*.

| Source of variation | ANOVA traits |     |          |          |          |
|---------------------|--------------|-----|----------|----------|----------|
|                     | SS           | df  | MS       | F        | p        |
| Intercept           | 140875.1     | 1   | 140875.1 | 785.1575 | 0.000000 |
| Maize type (A)      | 2865.9       | 2   | 1433.0   | 7.9865   | 0.000369 |
| Year (B)            | 3847.8       | 3   | 1282.6   | 7.1485   | 0.000097 |
| Localities (C)      | 8551.7       | 2   | 4275.8   | 23.8310  | 0.000000 |
| A X B               | 1350.7       | 6   | 225.1    | 1.2547   | 0.276174 |
| A X C               | 754.3        | 4   | 188.6    | 1.0510   | 0.379854 |
| B X C               | 4428.8       | 6   | 738.1    | 4.1139   | 0.000448 |
| A X B X C           | 1249.6       | 12  | 104.1    | 0.5804   | 0.859055 |
| Error               | 138514.4     | 772 | 179.4    |          |          |

Abbreviations: SS, sum of squares; df, degrees of freedom; MS, Mean square; F, F ratio; p, probability.

**Table S2.** ANOVA analysis of the influence of the maize type, cropping season, and field localization on BEA kernel contamination after plant inoculation with *F. temperatum*.

| Source of variation | ANOVA traits |     |          |          |          |
|---------------------|--------------|-----|----------|----------|----------|
|                     | SS           | df  | MS       | F        | p        |
| Intercept           | 20874.16     | 1   | 20874.16 | 454.6599 | 0.000000 |
| Maize type (A)      | 780.60       | 2   | 390.30   | 8.5011   | 0.000223 |
| Year (B)            | 1795.12      | 3   | 598.37   | 13.0332  | 0.000000 |
| Localities (C)      | 241.12       | 2   | 120.56   | 2.6259   | 0.073039 |
| A X B               | 652.21       | 6   | 108.70   | 2.3676   | 0.028426 |
| A X C               | 365.52       | 4   | 91.38    | 1.9903   | 0.094177 |
| B X C               | 936.68       | 6   | 156.11   | 3.4003   | 0.002569 |
| A X B X C           | 211.52       | 12  | 17.63    | 0.3839   | 0.969385 |
| Error               | 34479.60     | 751 | 45.91    |          |          |

Abbreviations: SS, sum of squares; df, degrees of freedom; MS, Mean square; F, F ratio; p, probability.

**Table S3.** ANOVA analysis of the influence of the maize type, cropping season, and field localization on the ergosterol (ERG) content after plant inoculation with *F. temperatum*.

| Source of variation | ANOVA traits |     |          |          |          |
|---------------------|--------------|-----|----------|----------|----------|
|                     | SS           | df  | MS       | F        | p        |
| Intercept           | 140875.1     | 1   | 140875.1 | 785.1575 | 0.000000 |
| Maize type (A)      | 2865.9       | 2   | 1433.0   | 7.9865   | 0.000369 |
| Year (B)            | 3847.8       | 3   | 1282.6   | 7.1485   | 0.000097 |
| Localities (C)      | 8551.7       | 2   | 4275.8   | 23.8310  | 0.000000 |
| A X B               | 1350.7       | 6   | 225.1    | 1.2547   | 0.276174 |
| A X C               | 754.3        | 4   | 188.6    | 1.0510   | 0.379854 |
| B X C               | 4428.8       | 6   | 738.1    | 4.1139   | 0.000448 |
| A X B X C           | 1249.6       | 12  | 104.1    | 0.5804   | 0.859055 |
| Error               | 138514.4     | 772 | 179.4    |          |          |

Abbreviations: SS, sum of squares; df, degrees of freedom; MS, Mean square; F, F ratio; p, probability.

**Table S4.** ANOVA analysis of the influence of the maize type, cropping season, and field localization influence on the amylose content in maize kernels.

| Source of variation | ANOVA traits |     |          |          |          |
|---------------------|--------------|-----|----------|----------|----------|
|                     | SS           | df  | MS       | F        | p        |
| Intercept           | 519879.4     | 1   | 519879.4 | 94644.65 | 0.000000 |
| Maize type (A)      | 2052.4       | 2   | 1026.2   | 186.82   | 0.000000 |
| Year (B)            | 1294.4       | 3   | 431.5    | 78.55    | 0.000000 |
| Localities (C)      | 220.6        | 2   | 110.3    | 20.08    | 0.000000 |
| A X B               | 32.6         | 6   | 5.4      | 0.99     | 0.431839 |
| A X C               | 51.6         | 4   | 12.9     | 2.35     | 0.052858 |
| B X C               | 145.2        | 6   | 24.2     | 4.40     | 0.000217 |
| A X B X C           | 246.9        | 12  | 20.6     | 3.75     | 0.000015 |
| Error               | 4251.6       | 774 | 5.5      |          |          |

Abbreviations: SS, sum of squares; df, degrees of freedom; MS, Mean square; F, F ratio; p, probability.
